# Supplementary material
Source: PubMed Central journal article supplement (PMC3624348)
Supplement: JVI.02617-12_zjv999097515sd1.pdf [file JVI.02617-12_zjv999097515sd1.pdf]

**Table S1. Primers used in this study**

| <b>Gene</b> | <b>NCBI ID</b> | <b>Forward primer</b>   | <b>Reverse Primer</b>   |
|-------------|----------------|-------------------------|-------------------------|
| PFKL        | NM_002626.4    | GAAGATGAAGACAGACATTC    | CCTCTGATGAGTACAGGTTG    |
| PFKM        | NM_000289.1    | CAGATCAGTGCCAATATAAC    | TAGTATTGAGTGCTGTGTCA    |
| PFKFB3(rat) | NM_057135.1    | GTGTGTGAGGAACTAACCTA    | CACTCTTGTCAAGGAAGTAG    |
| CDK6        | NM_001145306.1 | TATAGGTTTAGGGAGTGTACC   | GGAGATAGACAAGATGGATAC   |
| PRIM2       | NM_000947.2    | AAACTCCTCAACCCAAAC      | CCCCCACCTCTACAAAAA      |
| VRK2        | AB000450.1     | AGGCCATAATGGGACAATAGAGT | TTCTGTCTTCTCCTTGTGCTTTC |
| GAPDH       |                | ACCACAGTCCATGCCATCAC    | TCCACCACCCTGTTGCTG      |
